# Supplementary material for: Natural Dietary Compound Xanthohumol Regulates the Gut Microbiota and Its Metabolic Profile in a Mouse Model of Alzheimer’s Disease
Source: MDPI journal article supplement (doi:10.3390/molecules27041281), 2022-02-14
Supplement: s1 [file s1]

## **Supplementary Materials**

### **Natural Dietary Compound Xanthohumol Regulates the Gut Microbiota and Its Metabolic Profile in a Mouse Model of Alzheimer's Disease**

Wei Liu, Kaiwu He, Desheng Wu, Li Zhou, Guowei Li, Zequn Lin, Xifei Yang, Jianjun Liu, Maggie Pui Man Hoi

#### **Contents**

**Figure S1** Baseline data of NOR test in the prevention and therapeutic experiments using Xn.

**Figure S2** Species taxonomy comparison of intestinal microbiome on Family and Genus levels in the prevention and therapeutic experiments with Xn.

**Table S1** Ninety-two common differential species in the prevention and therapeutic experiments via LEfSe analysis.

**Table S2** Abundance comparison of differential bacteria on the Family level in the prevention and therapeutic experiments.

**Table S3** Abundance comparison of differential bacteria on the Genus level in the prevention and therapeutic experiments.

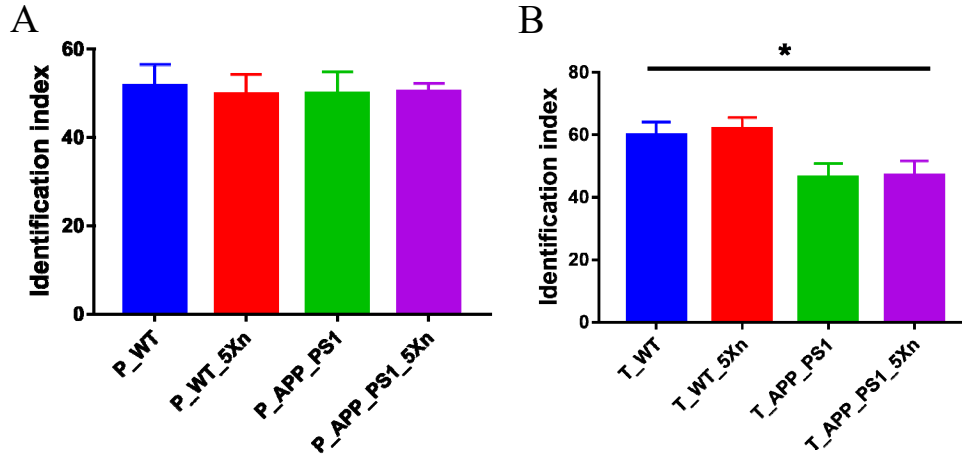

**Figure S1** Baseline data from the NOR test in the prevention and therapeutic experiments using Xn. (A) NOR test in the prevention experiment ( $n = 7-11$  per group). No difference was found in the baseline ( $F=0.04$ ,  $P=0.989$ ). (B) NOR test in the therapeutic experiment ( $n = 10-14$  per group). Significant difference was found in the baseline ( $F = 3.74$ ,  $p = 0.0183$ ). NOR, novel object recognition test. The baseline data from the NOR test were analyzed by one-way ANOVA. Error bar, SEM.

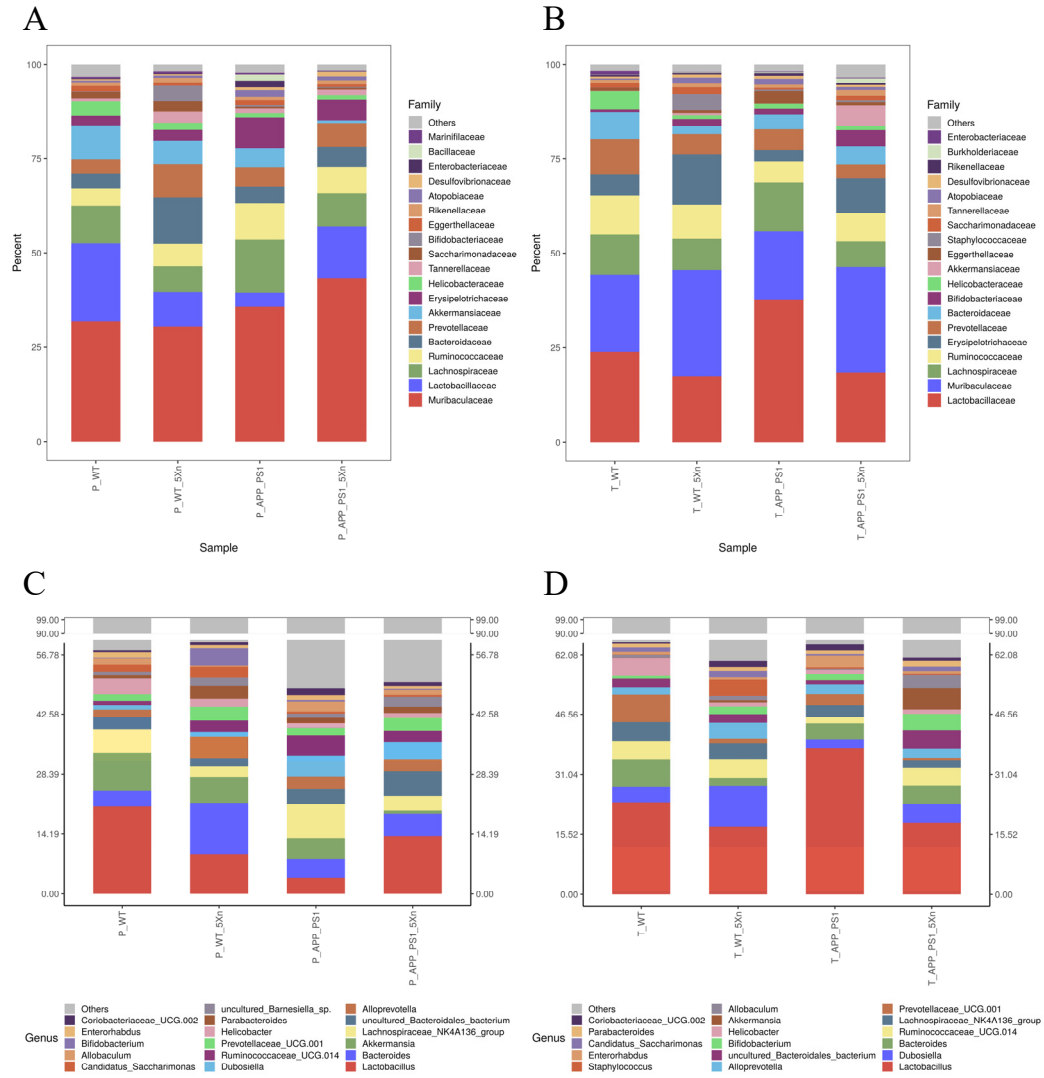

**Figure S2** Species taxonomy comparison of intestinal microbiome on Family and Genus levels in the prevention and therapeutic experiments with Xn. **(A,C)** Species composition and abundance analysis in the prevention experiment ( $n = 7-8$  per group). **(B,D)** Species composition and abundance analysis in the therapeutic experiment ( $n = 12$  per group). Different colors of the columns indicate different species. The length of the columns indicates the relative abundance of the species.

**Table S1** Ninety-two common differential species in the prevention and therapeutic experiments via LEfSe analysis.

| Different Species                                                                                                  | Prevention Experiment |       |             |                       | Therapy Experiment |               |             |             |
|--------------------------------------------------------------------------------------------------------------------|-----------------------|-------|-------------|-----------------------|--------------------|---------------|-------------|-------------|
|                                                                                                                    | Relative Abundance    | Group | LDA         | <i>p</i>              | Relative Abundance | Group         | LDA         | <i>p</i>    |
| D1__Bacteria.D2__Actinobacteria.D3__Acidimicrobiia                                                                 | 3.048704018           | P_WT  | 2.76914427  | 0.000332677           | 2.969026709        | T_APP_PS1_5Xn | 2.678142775 | 0.001313013 |
| D1__Bacteria.D2__Actinobacteria.D3__Acidimicrobiia.D4__Microtrichales                                              | 3.044851296           | P_WT  | 2.766523768 | 0.000164917           | 2.94561858         | T_APP_PS1_5Xn | 2.652557189 | 0.001457651 |
| D1__Bacteria.D2__Actinobacteria.D3__Acidimicrobiia.D4__Microtrichales.D5__Ilumatobacteraceae                       | 2.966081954           | P_WT  | 2.686010091 | $9.55 \times 10^{-5}$ | 2.854020132        | T_APP_PS1_5Xn | 2.559676669 | 0.001457651 |
| D1__Bacteria.D2__Actinobacteria.D3__Acidimicrobiia.D4__Microtrichales.D5__Ilumatobacteraceae.D6__uncultured        | 1.934759374           |       |             | 0.006074663           | 1.628779518        |               |             | 0.003091452 |
| D1__Bacteria.D2__Actinobacteria.D3__Acidimicrobiia.D4__Microtrichales.D5__Microtrichaceae                          | 1.534198621           |       |             | 0.008053849           | 1.833581771        |               |             | 0.006866718 |
| D1__Bacteria.D2__Actinobacteria.D3__Acidimicrobiia.D4__Microtrichales.D5__Microtrichaceae.D6__Sva0996_marine_group | 1.214402197           |       |             | 0.033801621           | 1.691314522        |               |             | 0.007761456 |
| D1__Bacteria.D2__Actinobacteria.D3__Acidimicrobiia.D4__Microtrichales.D5__uncultured                               | 1.99046404            |       |             | 0.000698642           | 1.919978996        |               |             | 0.012736314 |
| D1__Bacteria.D2__Actinobacteria.D3__Acidimicrobiia.D4__Microtrichales.D5__uncultured.D6__metagenome                | 1.82418793            |       |             | 0.000861258           | 1.872409677        |               |             | 0.003874887 |
| D1__Bacteria.D2__Actinobacteria.D3__Actinobacteria.D4__Corynebacteriales                                           | 2.179748085           |       |             | 0.012529197           | 2.45567934         | T_APP_PS1     | 2.140633491 | 0.019423178 |
| D1__Bacteria.D2__Actinobacteria.D3__Actinobacteria.D4__Corynebacteriales.D5__Mycobacteriaceae                      | 2.088117768           |       |             | 0.002284315           | 1.947337743        |               |             | 0.008899185 |
| D1__Bacteria.D2__Actinobacteria.D3__Actinobacteria.D4__Corynebacteriales.D5__Mycobacteriaceae.D6__Mycobacterium    | 2.088117768           |       |             | 0.002284315           | 1.947337743        |               |             | 0.008899185 |
| D1__Bacteria.D2__Actinobacteria.D3__Actinobacteria.D4__Micrococcales.D5__Microbacteriaceae.D6__Candidatus_Aquiluna | 2.573450444           | P_WT  | 2.28438957  | 0.000147682           | 2.555093182        | T_APP_PS1_5Xn | 2.269665678 | 0.002544355 |
| D1__Bacteria.D2__Actinobacteria.D3__Actinobacteria.D4__PeM15                                                       | 2.488257536           | P_WT  | 2.198336881 | 0.000120269           | 2.59019525         | T_APP_PS1_5Xn | 2.279306043 | 0.000922367 |
| D1__Bacteria.D2__Actinobacteria.D3__Actinobacteria.D4__PeM15.D5__metagenome                                        | 2.332596926           | P_WT  | 2.059576939 | 0.000150807           | 2.433292362        | T_APP_PS1_5Xn | 2.128989119 | 0.000731003 |
| D1__Bacteria.D2__Actinobacteria.D3__Actinobacteria.D4__PeM15.D5__metagenome.D6__metagenome                         | 2.332596926           | P_WT  | 2.058427205 | 0.000150807           | 2.433292362        | T_APP_PS1_5Xn | 2.1290613   | 0.000731003 |
| D1__Bacteria.D2__Actinobacteria.D3__Actinobacteria.D4__PeM15.D5__uncultured_bacterium                              | 1.967143836           |       |             | 0.000185142           | 2.071949795        |               |             | 0.001157323 |
| D1__Bacteria.D2__Actinobacteria.D3__Actinobacteria.D4__PeM15.D5__uncultured_bacterium.D6__uncultured_bacterium     | 1.967143836           |       |             | 0.000185142           | 2.071949795        |               |             | 0.001157323 |
| D1__Bacteria.D2__Actinobacteria.D3__Thermoleophilia                                                                | 2.109651559           | P_WT  | 2.015179734 | 0.001188053           | 2.624350577        | T_APP_PS1_5Xn | 2.421815196 | 0.008732333 |
| D1__Bacteria.D2__Actinobacteria.D3__Thermoleophilia.D4__Solirubrobacterales                                        | 1.984070535           | P_WT  | 2.081223232 | 0.001451998           | 2.150007691        |               |             | 0.004483976 |
| D1__Bacteria.D2__Actinobacteria.D3__Thermoleophilia.D4__Solirubrobacterales.D5__67_14                              | 1.77298476            |       |             | 0.001273353           | 1.920994678        |               |             | 0.004483976 |

|                                                                                                                                                            |             |                  |             |                         |             |                  |             |             |
|------------------------------------------------------------------------------------------------------------------------------------------------------------|-------------|------------------|-------------|-------------------------|-------------|------------------|-------------|-------------|
| D1__Bacteria.D2__Actinobacteria.D3__Thermoleophilia.D4__Solirubrobacterales.D5__67_14.D6__uncultured_bacterium                                             | 1.524675144 |                  |             | 0.001888883             | 1.401319557 |                  |             | 0.029588168 |
| D1__Bacteria.D2__Bacteroidetes.D3__Bacteroidia.D4__Bacteroidales.D5__Barnesiellaceae                                                                       | 1.462885885 |                  |             | 0.020581901             | 2.163004549 |                  |             | 0.007518415 |
| D1__Bacteria.D2__Bacteroidetes.D3__Bacteroidia.D4__Bacteroidales.D5__Barnesiellaceae.D6__uncultured                                                        | 1.462885885 |                  |             | 0.020581901             | 1.668827796 |                  |             | 0.018343846 |
| <b>D1__Bacteria.D2__Bacteroidetes.D3__Bacteroidia.D4__Bacteroidales.D5__Rikenellaceae.D6__Rikenella</b>                                                    | 3.444157657 | <b>P_APP_PS1</b> | 3.084689205 | 0.018362202             | 3.352872674 | <b>T_APP_PS1</b> | 2.994826976 | 0.030077956 |
| D1__Bacteria.D2__Bacteroidetes.D3__Bacteroidia.D4__Bacteroidetes_VC2_1_Bac22                                                                               | 1.926144545 |                  |             | 7.44 × 10 <sup>-5</sup> | 2.353768065 |                  |             | 0.00022668  |
| D1__Bacteria.D2__Bacteroidetes.D3__Bacteroidia.D4__Bacteroidetes_VC2_1_Bac22.D5__uncultured_Bacteroidetes_bacterium                                        | 1.835998776 |                  |             | 0.000453238             | 2.348409688 |                  |             | 0.000202454 |
| D1__Bacteria.D2__Bacteroidetes.D3__Bacteroidia.D4__Bacteroidetes_VC2_1_Bac22.D5__uncultured_Bacteroidetes_bacterium.D6__uncultured_Bacteroidetes_bacterium | 1.835998776 |                  |             | 0.000453238             | 2.348409688 |                  |             | 0.000202454 |
| D1__Bacteria.D2__Bacteroidetes.D3__Bacteroidia.D4__Chitinophagales                                                                                         | 3.078072338 | P_WT             | 2.789523963 | 0.000164917             | 3.00779975  | T_APP_PS1_5Xn    | 2.708914163 | 0.00641969  |
| D1__Bacteria.D2__Bacteroidetes.D3__Bacteroidia.D4__Chitinophagales.D5__Chitinophagaceae                                                                    | 2.617262691 | P_WT             | 2.322223506 | 0.000188266             | 2.545791491 | T_APP_PS1_5Xn    | 2.214695145 | 0.009713251 |
| D1__Bacteria.D2__Bacteroidetes.D3__Bacteroidia.D4__Chitinophagales.D5__Saprosiraceae                                                                       | 2.888822866 | P_WT             | 2.605643005 | 0.000131568             | 2.794841163 | T_APP_PS1_5Xn    | 2.51325456  | 0.000726278 |
| D1__Bacteria.D2__Bacteroidetes.D3__Bacteroidia.D4__Chitinophagales.D5__Saprosiraceae.D6__uncultured                                                        | 2.691574309 | P_WT             | 2.406388822 | 0.000164917             | 2.67705156  | T_APP_PS1_5Xn    | 2.390397453 | 0.001782606 |
| D1__Bacteria.D2__Bacteroidetes.D3__Bacteroidia.D4__Cytophagales                                                                                            | 2.840367926 | P_WT             | 2.542410491 | 0.000380283             | 2.592715569 | T_APP_PS1_5Xn    | 2.25699037  | 0.007102567 |
| D1__Bacteria.D2__Bacteroidetes.D3__Bacteroidia.D4__Cytophagales.D5__Cyclobacteriaceae                                                                      | 2.439735644 | P_WT             | 2.150188165 | 0.000150807             | 2.444513193 | T_APP_PS1_5Xn    | 2.163813777 | 0.001020201 |
| D1__Bacteria.D2__Bacteroidetes.D3__Bacteroidia.D4__Cytophagales.D5__Cyclobacteriaceae.D6__Algoriphagus                                                     | 2.190891163 |                  |             | 0.000188266             | 2.255170187 |                  |             | 0.001046176 |
| D1__Bacteria.D2__Bacteroidetes.D3__Bacteroidia.D4__Cytophagales.D5__Spirosomaceae                                                                          | 2.007759639 |                  |             | 0.008587382             | 1.829355584 |                  |             | 0.013525018 |
| D1__Bacteria.D2__Bacteroidetes.D3__Bacteroidia.D4__Cytophagales.D5__Spirosomaceae.D6__Lacihabitans                                                         | 1.298982341 |                  |             | 0.026591777             | 1.33560638  |                  |             | 0.005249029 |
| D1__Bacteria.D2__Bacteroidetes.D3__Bacteroidia.D4__Flavobacteriales.D5__Crocinitomicaceae                                                                  | 2.189900993 |                  |             | 0.000211824             | 2.001250264 |                  |             | 0.00282806  |
| D1__Bacteria.D2__Bacteroidetes.D3__Bacteroidia.D4__Flavobacteriales.D5__Cryomorphaceae.D6__NS10_marine_group                                               | 1.51338307  |                  |             | 0.008053849             | 1.843696762 |                  |             | 0.00120839  |
| D1__Bacteria.D2__Bacteroidetes.D3__Bacteroidia.D4__Sphingobacteriales                                                                                      | 2.944226285 | P_WT             | 2.652192902 | 0.000126849             | 2.889856197 | T_APP_PS1_5Xn    | 2.621860222 | 0.004133875 |
| D1__Bacteria.D2__Bacteroidetes.D3__Bacteroidia.D4__Sphingobacteriales.D5__AKYH767                                                                          | 2.150143266 |                  |             | 7.44 × 10 <sup>-5</sup> | 2.094657464 |                  |             | 0.00065909  |
| D1__Bacteria.D2__Bacteroidetes.D3__Bacteroidia.D4__Sphingobacteriales.D5__AKYH767.D6__uncultured_bacterium                                                 | 2.150143266 |                  |             | 7.44 × 10 <sup>-5</sup> | 2.085171219 |                  |             | 0.000729701 |
| D1__Bacteria.D2__Bacteroidetes.D3__Bacteroidia.D4__Sphingobacteriales.D5__env_OPS_17                                                                       | 1.624228883 |                  |             | 0.000470142             | 1.706757578 |                  |             | 0.000916083 |
| D1__Bacteria.D2__Bacteroidetes.D3__Bacteroidia.D4__Sphingobacteriales.D5__env_OPS_17.D6__uncultured_bacterium                                              | 1.624228883 |                  |             | 0.000470142             | 1.681497881 |                  |             | 0.000916083 |
| D1__Bacteria.D2__Bacteroidetes.D3__Ignavibacteria.D4__OPB56.D5__metagenome                                                                                 | 2.656992993 | P_WT             | 2.375656118 | 0.000356732             | 2.655022663 | T_APP_PS1_5Xn    | 2.390421715 | 0.000680001 |
| D1__Bacteria.D2__Bacteroidetes.D3__Ignavibacteria.D4__OPB56.D5__metagenome.D6__metagenome                                                                  | 2.656992993 | P_WT             | 2.37572317  | 0.000356732             | 2.655022663 | T_APP_PS1_5Xn    | 2.390421951 | 0.000680001 |

|                                                                                                                                 |             |             |             |                         |             |                 |             |             |
|---------------------------------------------------------------------------------------------------------------------------------|-------------|-------------|-------------|-------------------------|-------------|-----------------|-------------|-------------|
| D1__Bacteria.D2__Bacteroidetes.D3__Rhodothermia                                                                                 | 2.169259412 |             |             | 3.74 × 10 <sup>-5</sup> | 2.171596243 |                 |             | 0.000632031 |
| D1__Bacteria.D2__Chloroflexi                                                                                                    | 2.597746366 | P_WT        | 2.311359739 | 6.02 × 10 <sup>-5</sup> | 2.626351345 | T_APP_PS1_5Xn   | 2.396870814 | 0.002529705 |
| D1__Bacteria.D2__Chloroflexi.D3__Chloroflexia.D4__Chloroflexales                                                                | 2.20625423  |             |             | 4.72 × 10 <sup>-5</sup> | 1.933674538 |                 |             | 0.004640837 |
| D1__Bacteria.D2__Chloroflexi.D3__Chloroflexia.D4__Chloroflexiales.D5__Roseiflexaceae                                            | 2.119647002 |             |             | 2.60 × 10 <sup>-5</sup> | 1.827035361 |                 |             | 0.001353364 |
| D1__Bacteria.D2__Chloroflexi.D3__Chloroflexia.D4__Chloroflexiales.D5__Roseiflexaceae.D6__uncultured                             | 2.119647002 |             |             | 2.60 × 10 <sup>-5</sup> | 1.827035361 |                 |             | 0.001353364 |
| D1__Bacteria.D2__Chloroflexi.D3__Chloroflexia.D4__Thermomicrobiales                                                             | 1.609634554 |             |             | 0.000861258             | 1.170711391 |                 |             | 0.01195591  |
| D1__Bacteria.D2__Chloroflexi.D3__Chloroflexia.D4__Thermomicrobiales.D5__JG30_KF_CM45                                            | 1.539004708 |             |             | 0.001049695             | 1.170711391 |                 |             | 0.00638891  |
| D1__Bacteria.D2__Cyanobacteria.D3__Oxyphotobacteria                                                                             | 2.952764608 | P_WT        | 2.673081274 | 0.000126849             | 2.71399262  | T_APP_PS1_5Xn   | 2.403099612 | 0.001807566 |
| D1__Bacteria.D2__Cyanobacteria.D3__Oxyphotobacteria.D4__Chloroplast                                                             | 2.20066104  |             |             | 0.000316771             | 2.246922377 |                 |             | 0.001790432 |
| D1__Bacteria.D2__Firmicutes.D3__Bacilli.D4__Bacillales.D5__Family_XII                                                           | 2.353187944 | P_WT        | 2.214832669 | 0.000185142             | 2.77171895  | T_APP_PS1_5Xn   | 2.528483804 | 0.000689003 |
| D1__Bacteria.D2__Firmicutes.D3__Bacilli.D4__Bacillales.D5__Family_XII.D6__Exiguobacterium                                       | 2.353187944 | P_WT        | 2.161583902 | 0.000185142             | 2.77171895  | T_APP_PS1_5Xn   | 2.528484165 | 0.000689003 |
| <b>D1__Bacteria.D2__Firmicutes.D3__Bacilli.D4__Bacillales.D5__Planococcaceae</b>                                                | 2.313748786 | <b>P_WT</b> | 2.064274452 | 0.001135368             | 2.44603665  | <b>T_WT_5Xn</b> | 2.375239325 | 0.000918057 |
| D1__Bacteria.D2__Firmicutes.D3__Erysipelotrichia.D4__Erysipelotrichales.D5__Erysipelotrichaceae.D6__Erysipelotrichaceae_UCG_004 | 1.375180593 |             |             | 0.003216155             | 1.705721339 |                 |             | 0.006590879 |
| D1__Bacteria.D2__Gemmatimonadetes.D3__Gemmatimonadetes.D4__Gemmatimonadales.D5__Gemmatimonadaceae.D6__Gemmatimonas              | 1.927151337 |             |             | 0.000120269             | 1.938745685 |                 |             | 0.000957488 |
| D1__Bacteria.D2__Proteobacteria.D3__Alphaproteobacteria.D4__Azospirillales                                                      | 1.478979744 |             |             | 0.025095988             | 1.620220313 |                 |             | 0.006400905 |
| D1__Bacteria.D2__Proteobacteria.D3__Alphaproteobacteria.D4__Reyranelles                                                         | 1.194029852 |             |             | 0.029229698             | 1.766332003 |                 |             | 0.000121138 |
| D1__Bacteria.D2__Proteobacteria.D3__Alphaproteobacteria.D4__Reyranelles.D5__Reyraneliaceae                                      | 1.194029852 |             |             | 0.029229698             | 1.766332003 |                 |             | 0.000121138 |
| D1__Bacteria.D2__Proteobacteria.D3__Alphaproteobacteria.D4__Reyranelles.D5__Reyraneliaceae.D6__Reyranelia                       | 1.194029852 |             |             | 0.029229698             | 1.728553869 |                 |             | 0.000147636 |
| D1__Bacteria.D2__Proteobacteria.D3__Alphaproteobacteria.D4__Rhizobiales                                                         | 3.247386416 | P_WT        | 2.9331368   | 0.001468789             | 3.025031582 | T_APP_PS1_5Xn   | 2.707877068 | 0.044627909 |
| D1__Bacteria.D2__Proteobacteria.D3__Alphaproteobacteria.D4__Rhizobiales.D5__Rhizobiales_Incertae_Sedis                          | 2.731199512 | P_WT        | 2.430500969 | 0.000233996             | 2.664640349 | T_APP_PS1_5Xn   | 2.305760555 | 0.003279889 |
| D1__Bacteria.D2__Proteobacteria.D3__Alphaproteobacteria.D4__Rhizobiales.D5__Rhizobiales_Incertae_Sedis.D6__Alsobacter           | 1.294328875 |             |             | 0.000140705             | 1.305834806 |                 |             | 0.003118475 |
| D1__Bacteria.D2__Proteobacteria.D3__Alphaproteobacteria.D4__Rhodobacterales                                                     | 2.321436595 | P_WT        | 2.054952358 | 9.43 × 10 <sup>-5</sup> | 2.361470738 | T_APP_PS1_5Xn   | 2.00764959  | 0.000681451 |
| D1__Bacteria.D2__Proteobacteria.D3__Alphaproteobacteria.D4__Rhodobacterales.D5__Rhodobacteraceae                                | 2.321436595 | P_WT        | 2.054968596 | 9.43 × 10 <sup>-5</sup> | 2.361470738 | T_APP_PS1_5Xn   | 2.006898828 | 0.000681451 |
| D1__Bacteria.D2__Proteobacteria.D3__Alphaproteobacteria.D4__Rhodobacterales.D5__Rhodobacteraceae.D6__Paracoccus                 | 1.63144938  |             |             | 3.29 × 10 <sup>-5</sup> | 1.395935058 |                 |             | 0.001937176 |
| D1__Bacteria.D2__Proteobacteria.D3__Alphaproteobacteria.D4__Rhodobacterales.D5__Rhodobacteraceae.D6__Tabrizicola                | 1.782877223 |             |             | 0.00287242              | 1.606057038 |                 |             | 0.001864521 |
| D1__Bacteria.D2__Proteobacteria.D3__Alphaproteobacteria.D4__Sphingomonadales                                                    | 2.85003312  | P_WT        | 2.561602956 | 0.00095516              | 2.793951845 | T_APP_PS1_5Xn   | 2.4118532   | 0.008374721 |

|                                                                                                                           |             |           |             |                        |             |               |             |             |
|---------------------------------------------------------------------------------------------------------------------------|-------------|-----------|-------------|------------------------|-------------|---------------|-------------|-------------|
| D1__Bacteria.D2__Proteobacteria.D3__Alphaproteobacteria.D4__Sphingomonadales.D5__Sphingomonadaceae                        | 2.85003312  | P_WT      | 2.561469333 | 0.00095516             | 2.793951845 | T_APP_PS1_5Xn | 2.412875087 | 0.008374721 |
| D1__Bacteria.D2__Proteobacteria.D3__Alphaproteobacteria.D4__Sphingomonadales.D5__Sphingomonadaceae.D6__Altererythrobacter | 1.736491001 |           |             | 0.012719332            | 1.51189694  |               |             | 0.014544975 |
| D1__Bacteria.D2__Proteobacteria.D3__Alphaproteobacteria.D4__Sphingomonadales.D5__Sphingomonadaceae.D6__Novosphingobium    | 2.24251111  |           |             | 0.001231625            | 2.218504705 |               |             | 0.042144929 |
| <b>D1__Bacteria.D2__Proteobacteria.D3__Gammaproteobacteria</b>                                                            | 4.340473504 | P_APP_PS1 | 4.084995595 | 0.003259155            | 4.232125495 | T_APP_PS1_5Xn | 3.845280843 | 0.007554033 |
| D1__Bacteria.D2__Proteobacteria.D3__Gammaproteobacteria.D4__Betaproteobacteriales.D5__Burkholderiaceae.D6__Limnohabitans  | 1.35980199  |           |             | 0.000586246            | 1.473801842 |               |             | 0.000664499 |
| D1__Bacteria.D2__Proteobacteria.D3__Gammaproteobacteria.D4__Betaproteobacteriales.D5__Methylophilaceae                    | 2.40454377  | P_WT      | 2.161812377 | 0.00036888             | 2.216242729 |               |             | 0.013600085 |
| D1__Bacteria.D2__Proteobacteria.D3__Gammaproteobacteria.D4__Betaproteobacteriales.D5__Nitrosomonadaceae                   | 1.742222162 |           |             | 0.002900057            | 1.913012466 |               |             | 0.002639375 |
| D1__Bacteria.D2__Proteobacteria.D3__Gammaproteobacteria.D4__Betaproteobacteriales.D5__Rhodocyclaceae                      | 1.581762017 |           |             | 0.000182472            | 1.418388395 |               |             | 0.00256787  |
| D1__Bacteria.D2__Proteobacteria.D3__Gammaproteobacteria.D4__Cellvibrionales                                               | 2.077537072 |           |             | 0.001236706            | 2.482804785 | T_APP_PS1_5Xn | 2.15068148  | 0.002225229 |
| D1__Bacteria.D2__Proteobacteria.D3__Gammaproteobacteria.D4__Cellvibrionales.D5__Sphingobacteriaceae                       | 2.040228522 |           |             | 0.000182472            | 2.028428438 |               |             | 0.002626285 |
| D1__Bacteria.D2__Proteobacteria.D3__Gammaproteobacteria.D4__Cellvibrionales.D5__Sphingobacteriaceae.D6__BD1_7_clade       | 2.040228522 |           |             | 0.000182472            | 1.974510714 |               |             | 0.002622666 |
| D1__Bacteria.D2__Proteobacteria.D3__Gammaproteobacteria.D4__Pseudomonadales.D5__Pseudomonadaceae                          | 2.457716272 | P_APP_PS1 | 2.261051525 | 0.015128343            | 2.100034301 |               |             | 0.011273603 |
| D1__Bacteria.D2__Proteobacteria.D3__Gammaproteobacteria.D4__Pseudomonadales.D5__Pseudomonadaceae.D6__Pseudomonas          | 2.457716272 | P_APP_PS1 | 2.262045156 | 0.015128343            | 2.100034301 |               |             | 0.011273603 |
| D1__Bacteria.D2__Proteobacteria.D3__Gammaproteobacteria.D4__Steriodobacterales                                            | 1.741653363 |           |             | 0.001554545            | 1.58022256  |               |             | 0.010127667 |
| D1__Bacteria.D2__Proteobacteria.D3__Gammaproteobacteria.D4__Steriodobacterales.D5__Steriodobacteraceae                    | 1.741653363 |           |             | 0.001554545            | 1.529986923 |               |             | 0.021815973 |
| D1__Bacteria.D2__Proteobacteria.D3__Gammaproteobacteria.D4__Steriodobacterales.D5__Steriodobacteraceae.D6__uncultured     | 1.712669838 |           |             | 0.001056715            | 1.514112928 |               |             | 0.004343963 |
| D1__Bacteria.D2__Verrucomicrobia.D3__Verrucomicrobiae.D4__Chthoniobacteriales                                             | 2.20691232  |           |             | $2.05 \times 10^{-5}$  | 2.32743439  | T_APP_PS1_5Xn | 2.106334753 | 0.000812008 |
| D1__Bacteria.D2__Verrucomicrobia.D3__Verrucomicrobiae.D4__Chthoniobacteriales.D5__Chthoniobacteraceae                     | 2.128963402 |           |             | $2.05E \times 10^{-5}$ | 2.279194171 | T_APP_PS1_5Xn | 2.056872985 | 0.000746171 |
| D1__Bacteria.D2__Verrucomicrobia.D3__Verrucomicrobiae.D4__Opitutales                                                      | 1.95125095  |           |             | 0.000870253            | 1.771936832 |               |             | 0.003755453 |
| D1__Bacteria.D2__Verrucomicrobia.D3__Verrucomicrobiae.D4__Verrucomicrobiales.D5__Rubritaleaceae                           | 1.778986936 |           |             | 0.004130602            | 1.743081835 |               |             | 0.002036742 |
| D1__Bacteria.D2__Verrucomicrobia.D3__Verrucomicrobiae.D4__Verrucomicrobiales.D5__Rubritaleaceae.D6__Luteolibacter         | 1.778986936 |           |             | 0.004130602            | 1.633520928 |               |             | 0.002461392 |

These differential species were identified with LDA Scores > 2.0 are based on Kruskal-Wallis test and Wilcoxon test. Group indicates a high abundance of differential species and plays an important role in this group. D1, D2, D3, D4, D5 and D6 represent Domain, Phylum, Class, Order, Family and Genus, respectively. Black bold words indicate selected representative differential species. LDA, Line Discriminant Analysis. LEfSe, LDA Effect Size.

**Table S2** Abundance comparison of differential bacteria on Family level in the prevention and therapeutic experiments.

| Bacteria Name           | P_WT           | P_WT_5Xn       | P_APP_PS1      | P_APP_PS1_5Xn  | p value | Regulation  | T_WT           | T_WT_5Xn       | T_APP_PS1      | T_APP_PS1_5Xn  | p value | Regulation  |
|-------------------------|----------------|----------------|----------------|----------------|---------|-------------|----------------|----------------|----------------|----------------|---------|-------------|
| 0319-6G20               | 0.02149        | 0.00378        | 0.00312        | 0.00000        | 0.00023 | down        | 0.00000        | 0.00202        | 0.00322        | 0.00953        | 0.00195 | up          |
| 67-14                   | 0.00699        | 0.00358        | 0.00055        | 0.00000        | 0.00019 | down        | 0.00061        | 0.00036        | 0.00274        | 0.01454        | 0.00881 | irregular   |
| Acetobacteraceae        | 0.01908        | 0.00213        | 0.00037        | 0.00000        | 0.00005 | down        | 0.00012        | 0.00155        | 0.00972        | 0.01164        | 0.00560 | up          |
| Akkermansiaceae         | 9.00669        | 6.14889        | 4.98760        | 0.76721        | 0.02367 | down        | 0.10768        | 0.60356        | 0.02444        | 5.47819        | 0.03048 | up          |
| AKYH767                 | 0.01397        | 0.00318        | 0.00018        | 0.00000        | 0.00007 | down        | 0.00000        | 0.00071        | 0.00418        | 0.01224        | 0.00066 | up          |
| <b>Alteromonadaceae</b> | <b>0.02105</b> | <b>0.00080</b> | <b>0.00057</b> | <b>0.00000</b> | 0.00030 | <b>down</b> | <b>0.00014</b> | <b>0.00226</b> | <b>0.00585</b> | <b>0.00457</b> | 0.01155 | <b>down</b> |
| Balneolaceae            | 0.02669        | 0.00398        | 0.00165        | 0.00000        | 0.00006 | down        | 0.00014        | 0.00166        | 0.01139        | 0.02114        | 0.00392 | up          |
| Barnesiellaceae         | 0.00287        | 0.00159        | 0.00018        | 0.00000        | 0.02058 | down        | 0.00000        | 0.00036        | 0.00065        | 0.01444        | 0.00752 | up          |
| Bdellovibrionaceae      | 0.00752        | 0.00000        | 0.00000        | 0.00000        | 0.00000 | down        | 0.00000        | 0.00024        | 0.00302        | 0.00427        | 0.00476 | up          |
| Burkholderiaceae        | 0.18532        | 0.11719        | 0.19727        | 0.06831        | 0.03427 | down        | 0.09583        | 0.15678        | 0.20244        | 1.24573        | 0.03496 | up          |
| Caldilineaceae          | 0.01304        | 0.00298        | 0.00037        | 0.00000        | 0.00007 | down        | 0.00000        | 0.00285        | 0.00388        | 0.00574        | 0.00977 | up          |
| Chitinophagaceae        | 0.04131        | 0.00895        | 0.00514        | 0.00000        | 0.00019 | down        | 0.00178        | 0.00380        | 0.01383        | 0.03470        | 0.00914 | up          |
| Chthoniobacteraceae     | 0.01325        | 0.00199        | 0.00000        | 0.00000        | 0.00002 | down        | 0.00000        | 0.00095        | 0.00500        | 0.01873        | 0.00075 | up          |
| Clade_III               | 0.04865        | 0.01074        | 0.00532        | 0.00000        | 0.00023 | down        | 0.00014        | 0.00190        | 0.01786        | 0.03825        | 0.00208 | up          |
| Crocinitomicaceae       | 0.01533        | 0.00357        | 0.00092        | 0.00000        | 0.00021 | down        | 0.00000        | 0.00107        | 0.00433        | 0.00988        | 0.00354 | up          |
| Cryomorphaceae          | 0.05034        | 0.00676        | 0.00642        | 0.00000        | 0.00015 | down        | 0.00000        | 0.00197        | 0.01528        | 0.03032        | 0.00065 | up          |
| Cyanobiaceae            | 0.04988        | 0.01412        | 0.00183        | 0.00000        | 0.00012 | down        | 0.00000        | 0.00430        | 0.01892        | 0.03117        | 0.00336 | up          |
| Cyclobacteriaceae       | 0.02719        | 0.00497        | 0.00440        | 0.00000        | 0.00015 | down        | 0.00056        | 0.00257        | 0.00837        | 0.02748        | 0.00114 | up          |
| env.OPS_17              | 0.00675        | 0.00080        | 0.00000        | 0.00000        | 0.00090 | down        | 0.00000        | 0.00012        | 0.00147        | 0.00544        | 0.00072 | up          |
| Family_XII              | 0.02218        | 0.02028        | 0.00092        | 0.00000        | 0.00019 | down        | 0.00000        | 0.00321        | 0.00958        | 0.05877        | 0.00018 | up          |
| Fusobacteriaceae        | 0.02127        | 0.00020        | 0.00244        | 0.00079        | 0.00024 | down        | 0.00013        | 0.01344        | 0.00784        | 0.01098        | 0.00363 | up          |
| Gemmatimonadaceae       | 0.05668        | 0.01033        | 0.00330        | 0.00027        | 0.00022 | down        | 0.00013        | 0.00392        | 0.01827        | 0.04586        | 0.00055 | up          |
| Ilumatobacteraceae      | 0.09331        | 0.01370        | 0.00807        | 0.00000        | 0.00014 | down        | 0.00071        | 0.00815        | 0.03236        | 0.07256        | 0.00146 | up          |

|                            |                |                |                |                |         |             |                |                |                |                |         |             |
|----------------------------|----------------|----------------|----------------|----------------|---------|-------------|----------------|----------------|----------------|----------------|---------|-------------|
| JG30-KF-CM45               | 0.00341        | 0.00040        | 0.00092        | 0.00000        | 0.00105 | down        | 0.00000        | 0.00024        | 0.00039        | 0.00146        | 0.00639 | up          |
| Legionellaceae             | 0.00389        | 0.00020        | 0.00055        | 0.00000        | 0.00030 | down        | 0.00000        | 0.00024        | 0.00329        | 0.00378        | 0.01161 | up          |
| Metagenome                 | 0.08792        | 0.02530        | 0.01701        | 0.00167        | 0.00274 | down        | 0.00026        | 0.00857        | 0.02848        | 0.08624        | 0.00329 | up          |
| Methylophilaceae           | 0.02508        | 0.00507        | 0.00220        | 0.00000        | 0.00037 | down        | 0.00333        | 0.00449        | 0.00722        | 0.01624        | 0.01360 | up          |
| Microbacteriaceae          | 0.05268        | 0.04295        | 0.01256        | 0.00000        | 0.00077 | down        | 0.00132        | 0.00488        | 0.01968        | 0.04361        | 0.01883 | up          |
| Microtrichaceae            | 0.00339        | 0.00159        | 0.00000        | 0.00000        | 0.00805 | down        | 0.00000        | 0.00095        | 0.00208        | 0.00674        | 0.00687 | up          |
| Mycobacteriaceae           | 0.01211        | 0.00398        | 0.00202        | 0.00000        | 0.00228 | down        | 0.00076        | 0.00143        | 0.00546        | 0.00873        | 0.00890 | up          |
| <b>Nitriliruptoraceae</b>  | <b>0.00416</b> | <b>0.00264</b> | <b>0.00078</b> | <b>0.00024</b> | 0.04522 | <b>down</b> | 0.00000        | 0.00000        | 0.00243        | 0.00235        | 0.00029 | <b>down</b> |
| Nitrosomonadaceae          | 0.00543        | 0.00060        | 0.00018        | 0.00000        | 0.00290 | down        | 0.00000        | 0.00086        | 0.00263        | 0.00856        | 0.00240 | up          |
| <b>Nodosilineaceae</b>     | <b>0.01087</b> | <b>0.00099</b> | <b>0.00073</b> | <b>0.00000</b> | 0.00046 | <b>down</b> | 0.00000        | 0.00000        | 0.00554        | 0.00133        | 0.02483 | <b>down</b> |
| NS11-12_marine_group       | 0.05873        | 0.00794        | 0.00110        | 0.00000        | 0.00009 | down        | 0.00027        | 0.00440        | 0.02222        | 0.05408        | 0.00367 | up          |
| NS9_marine_group           | 0.02708        | 0.01670        | 0.00128        | 0.00000        | 0.00015 | down        | 0.00000        | 0.00464        | 0.00592        | 0.00676        | 0.00377 | up          |
| Oligoflexaceae             | 0.05664        | 0.01014        | 0.00275        | 0.00000        | 0.00008 | down        | 0.00000        | 0.00820        | 0.01842        | 0.01988        | 0.00324 | up          |
| Opitutaceae                | 0.00884        | 0.00378        | 0.00128        | 0.00000        | 0.00036 | down        | 0.00000        | 0.00012        | 0.00261        | 0.00531        | 0.01121 | up          |
| Pedosphaeraceae            | 0.00315        | 0.00080        | 0.00018        | 0.00000        | 0.00345 | down        | 0.00000        | 0.00107        | 0.00212        | 0.00411        | 0.00776 | up          |
| Phycisphaeraceae           | 0.00678        | 0.00099        | 0.00018        | 0.00000        | 0.00005 | down        | 0.00000        | 0.00000        | 0.00327        | 0.00425        | 0.00471 | up          |
| Planococcaceae             | 0.02022        | 0.00737        | 0.00055        | 0.00000        | 0.00114 | down        | 0.00048        | 0.02785        | 0.00559        | 0.02047        | 0.00086 | up          |
| Pseudohongiellaceae        | 0.02399        | 0.00358        | 0.00202        | 0.00000        | 0.00008 | down        | 0.00000        | 0.00074        | 0.01050        | 0.01348        | 0.00295 | up          |
| Pseudomonadaceae           | 0.02390        | 0.00387        | 0.02818        | 0.00071        | 0.01513 | down        | 0.00055        | 0.00159        | 0.00481        | 0.01237        | 0.01127 | up          |
| Reyranellaceae             | 0.00155        | 0.00040        | 0.00000        | 0.00000        | 0.02923 | down        | 0.00000        | 0.00000        | 0.00050        | 0.00575        | 0.00012 | up          |
| Rhizobiales_Incertae_Sedis | 0.05307        | 0.00696        | 0.00752        | 0.00000        | 0.00023 | down        | 0.00111        | 0.00668        | 0.01874        | 0.04550        | 0.00328 | up          |
| Rhodobacteraceae           | 0.05193        | 0.00894        | 0.00385        | 0.00000        | 0.00016 | down        | 0.00027        | 0.00722        | 0.01866        | 0.03715        | 0.00089 | up          |
| Rhodocyclaceae             | 0.00456        | 0.00060        | 0.00000        | 0.00000        | 0.00015 | down        | 0.00000        | 0.00083        | 0.00078        | 0.00259        | 0.00457 | up          |
| <b>Rhodospirillaceae</b>   | <b>0.00552</b> | <b>0.00139</b> | <b>0.00073</b> | <b>0.00000</b> | 0.00029 | <b>down</b> | <b>0.00000</b> | <b>0.00000</b> | <b>0.00186</b> | <b>0.00089</b> | 0.02520 | <b>down</b> |
| Rickettsiaceae             | 0.01146        | 0.00159        | 0.00037        | 0.00000        | 0.00006 | down        | 0.00000        | 0.00107        | 0.00437        | 0.00573        | 0.00325 | up          |
| Roseiflexaceae             | 0.01303        | 0.00179        | 0.00000        | 0.00000        | 0.00003 | down        | 0.00012        | 0.00036        | 0.00302        | 0.00663        | 0.00135 | up          |

|                                      |                |                |                |                |         |           |                |                |                |                |         |           |
|--------------------------------------|----------------|----------------|----------------|----------------|---------|-----------|----------------|----------------|----------------|----------------|---------|-----------|
| Rubritaleaceae                       | 0.00595        | 0.00219        | 0.00018        | 0.00000        | 0.00413 | down      | 0.00000        | 0.00028        | 0.00144        | 0.00547        | 0.00185 | up        |
| Saprospiraceae                       | 0.08554        | 0.01590        | 0.00367        | 0.00000        | 0.00011 | down      | 0.00000        | 0.00813        | 0.02652        | 0.06638        | 0.00073 | up        |
| Shewanellaceae                       | 0.00347        | 0.00139        | 0.00018        | 0.00000        | 0.00056 | down      | 0.00000        | 0.00048        | 0.00105        | 0.00150        | 0.04958 | up        |
| Sphingomonadaceae                    | 0.07069        | 0.00742        | 0.00870        | 0.00027        | 0.00096 | down      | 0.00702        | 0.00562        | 0.01546        | 0.06139        | 0.00852 | irregular |
| Spirosomaceae                        | 0.01006        | 0.00358        | 0.00202        | 0.00000        | 0.00859 | down      | 0.00041        | 0.00083        | 0.00131        | 0.00666        | 0.01353 | up        |
| Sphingobacteriaceae                  | 0.01079        | 0.00278        | 0.00000        | 0.00000        | 0.00018 | down      | 0.00000        | 0.00475        | 0.00446        | 0.01154        | 0.00288 | up        |
| Sporichthyaceae                      | 0.15490        | 0.01511        | 0.02109        | 0.00000        | 0.00008 | down      | 0.00013        | 0.00856        | 0.05372        | 0.08361        | 0.00457 | up        |
| Steroidobacteraceae                  | 0.00545        | 0.00080        | 0.00165        | 0.00000        | 0.00155 | down      | 0.00119        | 0.00107        | 0.00078        | 0.00335        | 0.02182 | up        |
| Terrimicrobiaceae                    | 0.00259        | 0.00040        | 0.00000        | 0.00000        | 0.00568 | down      | 0.00000        | 0.00000        | 0.00041        | 0.00164        | 0.01061 | up        |
| <b>Uncultured</b>                    | <b>0.03450</b> | <b>0.03208</b> | <b>0.01274</b> | <b>0.02335</b> | 0.04241 | <b>up</b> | <b>0.00756</b> | <b>0.03065</b> | <b>0.01028</b> | <b>0.08188</b> | 0.00038 | <b>up</b> |
| uncultured_Acidimicrobidae_bacterium | 0.00078        | 0.00000        | 0.00000        | 0.00000        | 0.02659 | down      | 0.00000        | 0.00000        | 0.00000        | 0.00135        | 0.02455 | up        |
| <b>uncultured_bacterium</b>          | 0.17711        | 0.07874        | <b>0.04677</b> | <b>0.09666</b> | 0.02678 | irregular | 0.03941        | 0.15819        | <b>0.09233</b> | <b>0.27353</b> | 0.00230 | up        |
| uncultured_Bacteroidetes_bacterium   | 0.00672        | 0.00099        | 0.00018        | 0.00000        | 0.00045 | down      | 0.00000        | 0.00107        | 0.00202        | 0.02240        | 0.00021 | up        |
| Unknown_Family                       | 0.03200        | 0.00338        | 0.00486        | 0.00000        | 0.00010 | down      | 0.00131        | 0.00226        | 0.01123        | 0.01944        | 0.00163 | up        |
| Verrucomicrobiaceae                  | 0.00608        | 0.00338        | 0.00018        | 0.00000        | 0.00084 | down      | 0.00012        | 0.00107        | 0.00145        | 0.00534        | 0.04123 | up        |
| Vibrionaceae                         | 0.01899        | 0.00537        | 0.00257        | 0.00000        | 0.00029 | down      | 0.00000        | 0.00112        | 0.00428        | 0.00562        | 0.03865 | up        |
| Virgulinella_fragilis                | 0.00896        | 0.00159        | 0.00018        | 0.00000        | 0.00287 | down      | 0.00000        | 0.00276        | 0.00209        | 0.00612        | 0.00593 | up        |

Abundance comparison of differential bacteria was done via Kruskal-Wallis test. Black boldface words indicate the bacteria with the same regulation tendency after Xn treatment.

**Table S3** Abundance comparison of differential bacteria on Genus level in the prevention and therapeutic experiments.

| Bacteria Name                                     | P_WT    | P_WT_5Xn | P_APP_PS1 | P_APP_PS1_5Xn | p value | Regulation | T_WT    | T_WT_5Xn | T_APP_PS1 | T_APP_PS1_5Xn | p value | Regulation |
|---------------------------------------------------|---------|----------|-----------|---------------|---------|------------|---------|----------|-----------|---------------|---------|------------|
| Acidibacter                                       | 0.02894 | 0.00338  | 0.00468   | 0.00000       | 0.00015 | down       | 0.00131 | 0.00226  | 0.01071   | 0.01701       | 0.00588 | up         |
| Akkermansia                                       | 9.00669 | 6.14889  | 4.98760   | 0.76721       | 0.02367 | down       | 0.10768 | 0.60356  | 0.02444   | 5.47819       | 0.03048 | up         |
| Algoriphagus                                      | 0.01533 | 0.00219  | 0.00275   | 0.00000       | 0.00019 | down       | 0.00000 | 0.00155  | 0.00352   | 0.01779       | 0.00105 | up         |
| Alsobacter                                        | 0.00194 | 0.00000  | 0.00000   | 0.00000       | 0.00014 | down       | 0.00000 | 0.00024  | 0.00118   | 0.00199       | 0.00312 | up         |
| Altererythrobacter                                | 0.00540 | 0.00060  | 0.00018   | 0.00000       | 0.01272 | down       | 0.00012 | 0.00097  | 0.00182   | 0.00322       | 0.01454 | up         |
| Arenimonas                                        | 0.00151 | 0.00000  | 0.00018   | 0.00000       | 0.02139 | down       | 0.00000 | 0.00000  | 0.00091   | 0.00959       | 0.03728 | up         |
| bacterium_enrichment_culture<br>_clone_B126(2011) | 0.01929 | 0.00338  | 0.00312   | 0.00000       | 0.00023 | down       | 0.00000 | 0.00119  | 0.00241   | 0.00885       | 0.00172 | up         |
| BD1-7_clade                                       | 0.01079 | 0.00278  | 0.00000   | 0.00000       | 0.00018 | down       | 0.00000 | 0.00276  | 0.00446   | 0.00933       | 0.00262 | up         |
| Bdellovibrio                                      | 0.00734 | 0.00000  | 0.00000   | 0.00000       | 0.00000 | down       | 0.00000 | 0.00024  | 0.00224   | 0.00335       | 0.00525 | up         |
| Candidatus_Aquiluna                               | 0.03699 | 0.00358  | 0.00862   | 0.00000       | 0.00015 | down       | 0.00028 | 0.00321  | 0.01420   | 0.03547       | 0.00254 | up         |
| Candidatus_Chloroploca                            | 0.00227 | 0.00020  | 0.00018   | 0.00000       | 0.01071 | down       | 0.00014 | 0.00000  | 0.00040   | 0.00157       | 0.04048 | irregular  |
| Candidatus_Megaira                                | 0.01146 | 0.00159  | 0.00037   | 0.00000       | 0.00006 | down       | 0.00000 | 0.00107  | 0.00410   | 0.00545       | 0.00309 | up         |
| Candidatus_Methylopumilus                         | 0.00904 | 0.00239  | 0.00147   | 0.00000       | 0.00023 | down       | 0.00000 | 0.00155  | 0.00261   | 0.00638       | 0.00852 | up         |
| Cephaloticoccus                                   | 0.00255 | 0.00020  | 0.00037   | 0.00000       | 0.00423 | down       | 0.00000 | 0.00000  | 0.00104   | 0.00161       | 0.01603 | up         |
| Cetobacterium                                     | 0.02127 | 0.00020  | 0.00169   | 0.00024       | 0.00009 | down       | 0.00013 | 0.01333  | 0.00733   | 0.01053       | 0.01657 | up         |
| Chryseomicrobium                                  | 0.00377 | 0.00179  | 0.00018   | 0.00000       | 0.00068 | down       | 0.00000 | 0.00037  | 0.00104   | 0.00806       | 0.01964 | up         |
| CK06-06-Mud-MAS4B-21                              | 0.01147 | 0.00199  | 0.00037   | 0.00000       | 0.00006 | down       | 0.00014 | 0.00012  | 0.00441   | 0.00996       | 0.00227 | up         |
| CL500-29_marine_group                             | 0.07981 | 0.01054  | 0.00660   | 0.00000       | 0.00010 | down       | 0.00059 | 0.00654  | 0.02831   | 0.06328       | 0.00322 | up         |
| CL500-3                                           | 0.00678 | 0.00099  | 0.00018   | 0.00000       | 0.00005 | down       | 0.00000 | 0.00000  | 0.00327   | 0.00425       | 0.00471 | up         |
| Comamonas                                         | 0.00212 | 0.00019  | 0.00018   | 0.00000       | 0.04791 | down       | 0.00014 | 0.00052  | 0.00200   | 0.00459       | 0.02347 | up         |
| Cyanobium_PCC-6307                                | 0.04881 | 0.01392  | 0.00183   | 0.00000       | 0.00015 | down       | 0.00000 | 0.00416  | 0.01879   | 0.03093       | 0.00190 | up         |
| Dinghuibacter                                     | 0.01716 | 0.00199  | 0.00147   | 0.00000       | 0.00006 | down       | 0.00000 | 0.00095  | 0.00613   | 0.01532       | 0.00108 | up         |

|                                |                |                |                |                |         |             |                |                |                |                |         |             |
|--------------------------------|----------------|----------------|----------------|----------------|---------|-------------|----------------|----------------|----------------|----------------|---------|-------------|
| Erysipelotrichaceae_UCG-004    | 0.00236        | 0.00000        | 0.00018        | 0.00000        | 0.00322 | down        | 0.00000        | 0.00000        | 0.00132        | 0.00500        | 0.00659 | up          |
| Eubacterium_brachy_group       | 0.02660        | 0.01759        | 0.05078        | 0.09433        | 0.01966 | irregular   | 0.02902        | 0.02126        | 0.05266        | 0.05396        | 0.04170 | irregular   |
| Exiguobacterium                | 0.02218        | 0.02028        | 0.00092        | 0.00000        | 0.00019 | down        | 0.00000        | 0.00321        | 0.00958        | 0.05835        | 0.00069 | up          |
| Fluviicola                     | 0.01314        | 0.00357        | 0.00073        | 0.00000        | 0.00026 | down        | 0.00000        | 0.00024        | 0.00394        | 0.00936        | 0.00927 | up          |
| Gemmatimonas                   | 0.00836        | 0.00139        | 0.00073        | 0.00000        | 0.00012 | down        | 0.00000        | 0.00024        | 0.00267        | 0.00854        | 0.00096 | up          |
| Gordonibacter                  | 0.00143        | 0.01894        | 0.00884        | 0.00663        | 0.01815 | irregular   | 0.00890        | 0.02177        | 0.03741        | 0.03555        | 0.04867 | irregular   |
| Haliscomenobacter              | 0.01658        | 0.00258        | 0.00000        | 0.00000        | 0.00110 | down        | 0.00000        | 0.00250        | 0.00539        | 0.00695        | 0.02294 | up          |
| HdN1                           | 0.00213        | 0.00000        | 0.00000        | 0.00000        | 0.00533 | down        | 0.00000        | 0.00000        | 0.00106        | 0.00129        | 0.00438 | up          |
| hgcI_clade                     | 0.14736        | 0.01292        | 0.02054        | 0.00000        | 0.00008 | down        | 0.00013        | 0.00808        | 0.05109        | 0.07348        | 0.00457 | up          |
| Jeotgalibacillus               | 0.00499        | 0.00060        | 0.00000        | 0.00000        | 0.00090 | down        | 0.00000        | 0.00095        | 0.00264        | 0.00226        | 0.02377 | irregular   |
| <b>Lachnospiraceae_UCG-001</b> | <b>0.18847</b> | <b>0.02420</b> | <b>0.16229</b> | <b>0.11142</b> | 0.04728 | <b>down</b> | <b>0.27274</b> | <b>0.03543</b> | <b>0.15229</b> | <b>0.03189</b> | 0.00343 | <b>down</b> |
| Lacihabitans                   | 0.00197        | 0.00000        | 0.00000        | 0.00000        | 0.02659 | down        | 0.00000        | 0.00024        | 0.00000        | 0.00213        | 0.00525 | up          |
| Lautropia                      | 0.00455        | 0.00080        | 0.00037        | 0.00000        | 0.00423 | down        | 0.00000        | 0.00000        | 0.00065        | 0.00264        | 0.02483 | up          |
| LD29                           | 0.01305        | 0.00179        | 0.00000        | 0.00000        | 0.00002 | down        | 0.00000        | 0.00095        | 0.00500        | 0.01112        | 0.00117 | up          |
| Legionella                     | 0.00351        | 0.00020        | 0.00055        | 0.00000        | 0.00037 | down        | 0.00000        | 0.00024        | 0.00316        | 0.00366        | 0.01207 | up          |
| Limnobacter                    | 0.01872        | 0.00298        | 0.00073        | 0.00000        | 0.00006 | down        | 0.00000        | 0.00178        | 0.00525        | 0.00974        | 0.00190 | up          |
| Limnohabitans                  | 0.00227        | 0.00000        | 0.00018        | 0.00000        | 0.00059 | down        | 0.00000        | 0.00000        | 0.00080        | 0.00294        | 0.00066 | up          |
| Luteolibacter                  | 0.00595        | 0.00219        | 0.00018        | 0.00000        | 0.00413 | down        | 0.00000        | 0.00014        | 0.00144        | 0.00425        | 0.00224 | up          |
| Metagenome                     | 0.11946        | 0.03305        | 0.01866        | 0.00167        | 0.00280 | down        | 0.00190        | 0.01309        | 0.03513        | 0.11199        | 0.01682 | up          |
| MWH-UniP1_aquatic_group        | 0.04718        | 0.00338        | 0.00312        | 0.00000        | 0.00004 | down        | 0.00000        | 0.00357        | 0.02947        | 0.03634        | 0.00226 | up          |
| Mycobacterium                  | 0.01211        | 0.00398        | 0.00202        | 0.00000        | 0.00228 | down        | 0.00076        | 0.00143        | 0.00546        | 0.00873        | 0.00890 | up          |
| <b>Nodosilinea_PCC-7104</b>    | 0.01030        | 0.00080        | <b>0.00073</b> | <b>0.00000</b> | 0.00057 | <b>down</b> | 0.00000        | 0.00000        | <b>0.00489</b> | <b>0.00133</b> | 0.02483 | <b>down</b> |
| Noviherbaspirillum             | 0.00248        | 0.00040        | 0.00000        | 0.00000        | 0.00679 | down        | 0.00000        | 0.00024        | 0.00093        | 0.00129        | 0.01781 | up          |
| Novosphingobium                | 0.01723        | 0.00326        | 0.00203        | 0.00027        | 0.00123 | down        | 0.00462        | 0.00144        | 0.00536        | 0.01634        | 0.04214 | irregular   |
| NS10_marine_group              | 0.00322        | 0.00199        | 0.00000        | 0.00000        | 0.00805 | down        | 0.00000        | 0.00012        | 0.00053        | 0.00686        | 0.00109 | up          |
| oc32                           | 0.00097        | 0.00000        | 0.00000        | 0.00000        | 0.02659 | down        | 0.00000        | 0.00024        | 0.00052        | 0.00122        | 0.04834 | up          |

|                                         |         |         |                |                |         |           |         |         |                |                |         |           |
|-----------------------------------------|---------|---------|----------------|----------------|---------|-----------|---------|---------|----------------|----------------|---------|-----------|
| OM43_clade                              | 0.00437 | 0.00020 | 0.00055        | 0.00000        | 0.00046 | down      | 0.00000 | 0.00048 | 0.00236        | 0.00295        | 0.00584 | up        |
| Paracoccus                              | 0.00421 | 0.00119 | 0.00000        | 0.00000        | 0.00003 | down      | 0.00000 | 0.00119 | 0.00094        | 0.00246        | 0.00194 | up        |
| Peredibacter                            | 0.00562 | 0.00000 | 0.00000        | 0.00000        | 0.00014 | down      | 0.00000 | 0.00000 | 0.00108        | 0.00112        | 0.04144 | up        |
| Perlucidibaca                           | 0.02897 | 0.00099 | 0.00110        | 0.00000        | 0.00002 | down      | 0.00000 | 0.00262 | 0.01479        | 0.01629        | 0.00879 | up        |
| Phaeodactylibacter                      | 0.00444 | 0.00020 | 0.00000        | 0.00000        | 0.01810 | down      | 0.00000 | 0.00024 | 0.00197        | 0.00354        | 0.02715 | up        |
| Polynucleobacter                        | 0.00240 | 0.00040 | 0.00000        | 0.00000        | 0.00018 | down      | 0.00000 | 0.00024 | 0.00226        | 0.00434        | 0.00410 | up        |
| <b>Prevotella_9</b>                     | 0.00000 | 0.00075 | <b>0.00000</b> | <b>0.00051</b> | 0.04506 | up        | 0.00215 | 0.00000 | <b>0.00047</b> | <b>0.28009</b> | 0.02007 | irregular |
| Pseudohongiella                         | 0.02399 | 0.00358 | 0.00202        | 0.00000        | 0.00008 | down      | 0.00000 | 0.00074 | 0.01050        | 0.01348        | 0.00295 | up        |
| Pseudomonas                             | 0.02390 | 0.00387 | 0.02818        | 0.00071        | 0.01513 | down      | 0.00055 | 0.00159 | 0.00481        | 0.01237        | 0.01127 | up        |
| Reyranella                              | 0.00155 | 0.00040 | 0.00000        | 0.00000        | 0.02923 | down      | 0.00000 | 0.00000 | 0.00050        | 0.00526        | 0.00015 | up        |
| Rheinheimera                            | 0.01285 | 0.00040 | 0.00000        | 0.00000        | 0.00007 | down      | 0.00014 | 0.00119 | 0.00453        | 0.00308        | 0.02787 | irregular |
| <b>Rikenella</b>                        | 0.06189 | 0.08648 | <b>0.27206</b> | <b>0.03600</b> | 0.01836 | irregular | 0.05988 | 0.04465 | <b>0.22151</b> | <b>0.14316</b> | 0.03122 | down      |
| Roseomonas                              | 0.01334 | 0.00099 | 0.00018        | 0.00000        | 0.00002 | down      | 0.00012 | 0.00036 | 0.00761        | 0.01005        | 0.00300 | up        |
| Rubellimicrobium                        | 0.00292 | 0.00020 | 0.00018        | 0.00000        | 0.00239 | down      | 0.00000 | 0.00012 | 0.00066        | 0.00487        | 0.01393 | up        |
| Rubrivivax                              | 0.02286 | 0.00418 | 0.00073        | 0.00000        | 0.00006 | down      | 0.00095 | 0.00273 | 0.00639        | 0.00994        | 0.01992 | up        |
| Ruminiclostridium                       | 0.10911 | 0.03148 | 0.15168        | 0.40615        | 0.00319 | irregular | 0.23312 | 0.15394 | 0.28351        | 0.06192        | 0.00315 | down      |
| Sandarakinorhabdus                      | 0.00476 | 0.00000 | 0.00018        | 0.00000        | 0.00047 | down      | 0.00000 | 0.00071 | 0.00237        | 0.00235        | 0.02001 | up        |
| Sediminibacterium                       | 0.00560 | 0.00099 | 0.00000        | 0.00000        | 0.00015 | down      | 0.00000 | 0.00048 | 0.00196        | 0.01008        | 0.00366 | up        |
| Shewanella                              | 0.00347 | 0.00139 | 0.00018        | 0.00000        | 0.00056 | down      | 0.00000 | 0.00048 | 0.00105        | 0.00150        | 0.04958 | up        |
| Sva0996_marine_group                    | 0.00162 | 0.00139 | 0.00000        | 0.00000        | 0.03380 | down      | 0.00000 | 0.00081 | 0.00117        | 0.00485        | 0.00776 | up        |
| Tabrizicola                             | 0.00599 | 0.00119 | 0.00018        | 0.00000        | 0.00287 | down      | 0.00000 | 0.00155 | 0.00119        | 0.00399        | 0.00186 | up        |
| Terrimicrobium                          | 0.00259 | 0.00040 | 0.00000        | 0.00000        | 0.00568 | down      | 0.00000 | 0.00000 | 0.00041        | 0.00164        | 0.01061 | up        |
| Turicibacter                            | 0.00078 | 0.09521 | 0.00303        | 0.00464        | 0.02516 | up        | 0.15240 | 0.12339 | 0.00561        | 0.00096        | 0.00838 | down      |
| uncultured_Acidimicrobiae_b<br>acterium | 0.00078 | 0.00000 | 0.00000        | 0.00000        | 0.02659 | down      | 0.00000 | 0.00000 | 0.00000        | 0.00135        | 0.02455 | up        |
| uncultured_actinobacterium              | 0.00252 | 0.00128 | 0.00000        | 0.00000        | 0.00995 | down      | 0.00000 | 0.00000 | 0.00028        | 0.00784        | 0.00589 | up        |

|                                       |         |         |         |         |         |      |         |         |         |         |         |           |
|---------------------------------------|---------|---------|---------|---------|---------|------|---------|---------|---------|---------|---------|-----------|
| uncultured_Bacteroidetes_bacterium    | 0.01061 | 0.00119 | 0.00018 | 0.00000 | 0.00045 | down | 0.00000 | 0.00166 | 0.00242 | 0.02656 | 0.00022 | up        |
| uncultured_Flexibacteraceae_bacterium | 0.00763 | 0.00119 | 0.00000 | 0.00000 | 0.00110 | down | 0.00000 | 0.00012 | 0.00380 | 0.00760 | 0.01335 | up        |
| uncultured_gamma_proteobacterium      | 0.00298 | 0.00139 | 0.00165 | 0.00000 | 0.03845 | down | 0.00000 | 0.00036 | 0.00053 | 0.00119 | 0.02996 | up        |
| uncultured_marine_bacterium           | 0.00911 | 0.00060 | 0.00037 | 0.00000 | 0.00037 | down | 0.00000 | 0.00036 | 0.00568 | 0.00549 | 0.00056 | irregular |
| uncultured_Sphingobacterium_sp.       | 0.02106 | 0.00139 | 0.00018 | 0.00000 | 0.00002 | down | 0.00000 | 0.00190 | 0.00608 | 0.01660 | 0.00158 | up        |
| Vibrio                                | 0.01899 | 0.00537 | 0.00257 | 0.00000 | 0.00029 | down | 0.00000 | 0.00112 | 0.00402 | 0.00562 | 0.03865 | up        |
| Virgulinella_fragilis                 | 0.00896 | 0.00159 | 0.00018 | 0.00000 | 0.00287 | down | 0.00000 | 0.00276 | 0.00209 | 0.00612 | 0.00593 | up        |

Abundance comparison of differential bacteria was done via the Kruskal-Wallis test. Black boldface words indicate the bacteria with the same regulation tendency after Xn treatment.
